# Supplementary material
Source: Springer Nature journal article supplement (https://www.springermedizin.de/resource/supplementary/12889_2012_4268_MOESM2_ESM.pdf/9492070)

Hospitalisations per  
10,000 population

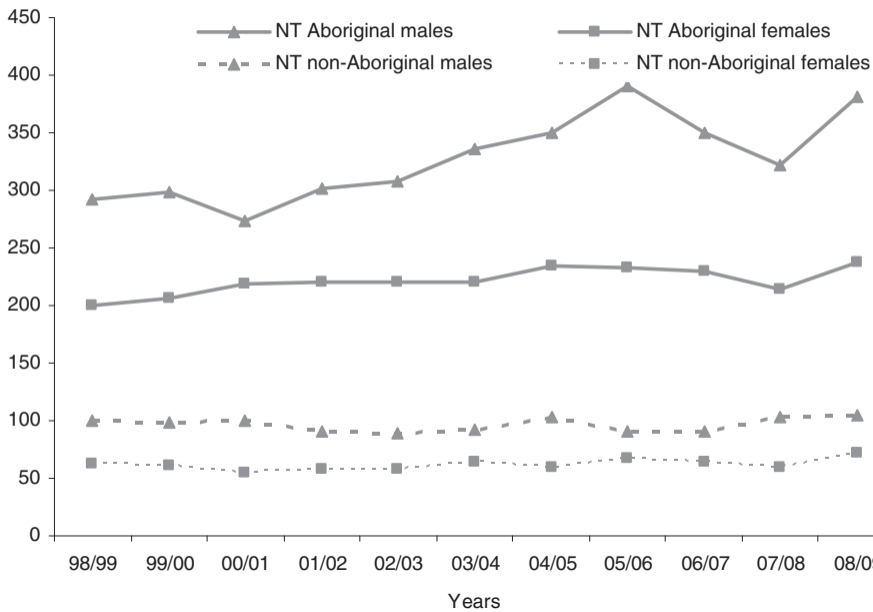

Supplement: MOESM2 [file 9492070]
